# Supplementary material
Source: publisher figshare collection journal article supplement (https://frontiersin.figshare.com/ndownloader/files/13723904)
Supplement: Supplementary file [file 13723904]

## Supplementary Material

### Mn-Mimochrome VI\*a: an Artificial Metalloenzyme with Peroxygenase Activity

Linda Leone, Daniele D'Alonzo, Véronique Balland, Gerardo Zambrano, Marco Chino, Flavia Nastri, Ornella Maglio, Vincenzo Pavone and Angela Lombardi\*

\* **Correspondence:** prof. Angela Lombardi: [alombard@unina.it](mailto:alombard@unina.it)

#### 1 Supplementary Data

##### *pH titration data fitting*

The pH-dependent equilibrium is described by the following equation:

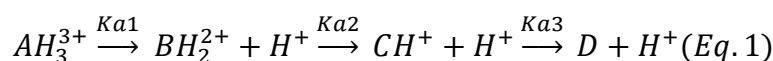

The equilibrium constants,  $K_{a1}$ ,  $K_{a2}$  and  $K_{a3}$ , can be expressed as:

$$K_{a1} = \frac{[BH_2^{2+}] \cdot [H^+]}{[AH_3^{3+}]} ; K_{a2} = \frac{[CH^+] \cdot [H^+]}{[BH_2^{2+}]} ; K_{a3} = \frac{[D] \cdot [H^+]}{[CH^+]} \text{ (Eq. 2)}$$

The total concentration ( $C_{tot}$ ) of  $Mn^{III}$ -MC6a can be expressed as sum of the four species:

$$C_{tot} = [AH_3^{3+}] + [BH_2^{2+}] + [CH^+] + [D] \text{ (Eq. 3)}$$

The total absorbance ( $A_{tot}$ ) can be expressed as the sum of the contribution of all the four species:

$$A_{tot} = \varepsilon_A[AH_3^{3+}] + \varepsilon_B[BH_2^{2+}] + \varepsilon_C[CH^+] + \varepsilon_D[D] \text{ (Eq. 4)}$$

The total concentration and the total absorbance can be indicated in dependence of [D]:

$$C_{tot} = [D] + \frac{[D] \cdot [H^+]}{K_{a3}} + \frac{[D] \cdot [H^+]^2}{K_{a3} \cdot K_{a2}} + \frac{[D] \cdot [H^+]^3}{K_{a3} \cdot K_{a2} \cdot K_{a1}} \text{ (Eq. 5)}$$

$$A_{tot} = \varepsilon_D \cdot [D] + \varepsilon_C \cdot \frac{[D] \cdot [H^+]}{K_{a3}} + \varepsilon_B \cdot \frac{[D] \cdot [H^+]^2}{K_{a3} \cdot K_{a2}} + \varepsilon_A \cdot \frac{[D] \cdot [H^+]^3}{K_{a3} \cdot K_{a2} \cdot K_{a1}} \text{ (Eq. 6)}$$

Equations 5 and 6 can be rearranged, giving:

$$A_{tot} = \frac{C_{tot} \cdot \left( \varepsilon_D + \varepsilon_C \cdot \frac{[H^+]}{K_{a3}} + \varepsilon_B \cdot \frac{[H^+]^2}{K_{a3} \cdot K_{a2}} + \varepsilon_A \cdot \frac{[H^+]^3}{K_{a3} \cdot K_{a2} \cdot K_{a1}} \right)}{\left( 1 + \frac{[H^+]}{K_{a3}} + \frac{[H^+]^2}{K_{a3} \cdot K_{a2}} + \frac{[H^+]^3}{K_{a3} \cdot K_{a2} \cdot K_{a1}} \right)} \quad (Eq. 7)$$

Equation 7 can be written as:

$$A_{tot} = \frac{\left( A_D + A_C \cdot \frac{[H^+]}{K_{a3}} + A_B \cdot \frac{[H^+]^2}{K_{a3} \cdot K_{a2}} + A_A \cdot \frac{[H^+]^3}{K_{a3} \cdot K_{a2} \cdot K_{a1}} \right)}{\left( 1 + \frac{[H^+]}{K_{a3}} + \frac{[H^+]^2}{K_{a3} \cdot K_{a2}} + \frac{[H^+]^3}{K_{a3} \cdot K_{a2} \cdot K_{a1}} \right)} \quad (Eq. 8)$$

$A_A$ ,  $A_B$ ,  $A_C$ ,  $A_D$ , parameters represent the absorbance of the four differently protonated species. Species A-D are referred as **1-4** in the main text. Equation 8 was used to fit the experimental  $A_{365}$  (Soret) data points (Figure 4A, main text), which were reported as molar extinction coefficient at 365 nm ( $\varepsilon_{365}$ ).

## 2 Supplementary Figures and Tables

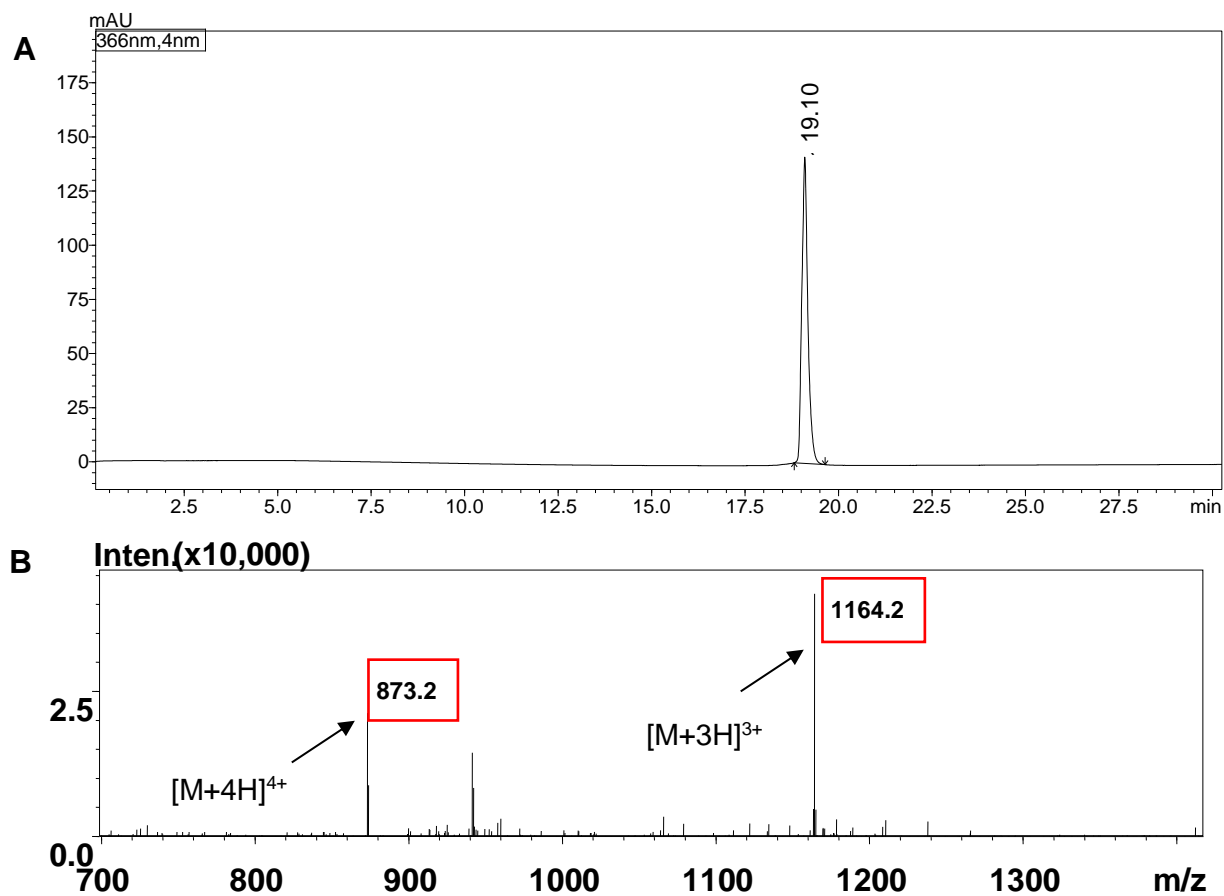

**Figure S1:** LC-MS chromatogram of pure Mn<sup>III</sup>-MC6a (A), and its positive ESI-MS  $m/z$  spectrum (B). The peaks corresponding to the intact compound, carrying the indicated number of charges (protons), are evidenced. Experimental mass:  $(3489.2 \pm 0.4)$  Da; Theoretical mass: 3488.8 Da.

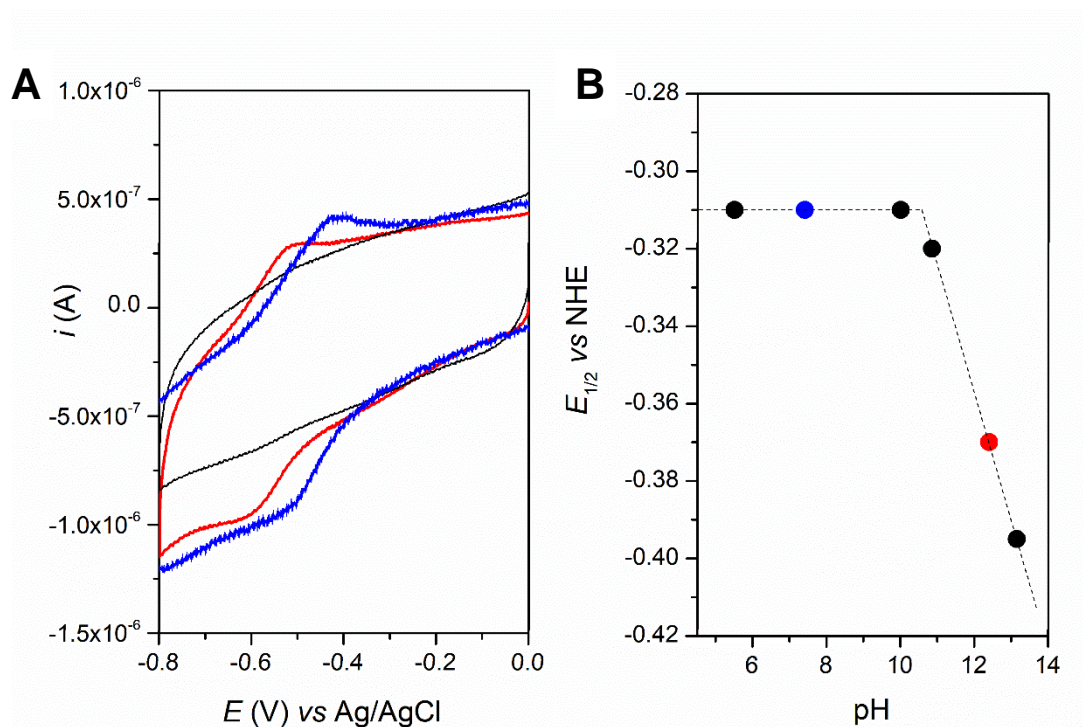

**Figure S2:** A) Cyclic voltammograms (CVs) of Mn-MC6\*a ( $C = 100 \mu\text{M}$  in buffer solution containing 30% TFE ( $v/v$ ),  $T = 25^\circ\text{C}$ ) recorded at  $10 \text{ mV}\cdot\text{s}^{-1}$  scan speed at pH 7.4 (blue trace) and 12.4 (red trace). CV acquired from a solution at pH 12.4 in absence of Mn-MC6\*a is also shown (black trace). B) pH-dependence of  $\text{Mn}^{\text{III}}/\text{Mn}^{\text{II}}$  formal reduction potential ( $E_{1/2}$ ).

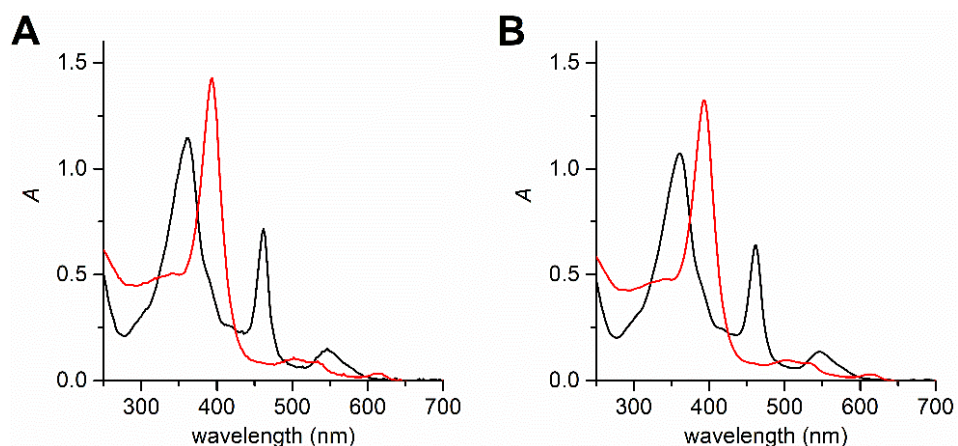

**Figure S3:** UV-Vis spectra of Mn-MC6\*a ( $C = 20 \mu\text{M}$  in 60 mM carbonate buffer containing 40% TFE ( $v/v$ ), pH 9.5;  $T = 25^\circ\text{C}$ ) before (black lines) and after (red lines) treatment with different oxidizing agents: A) NaOCl (1000 eq.); B)  $\text{KHSO}_5$  (100 eq.). No reaction was observed upon treatment with  $t\text{-BuOOH}$  (100 eq.).

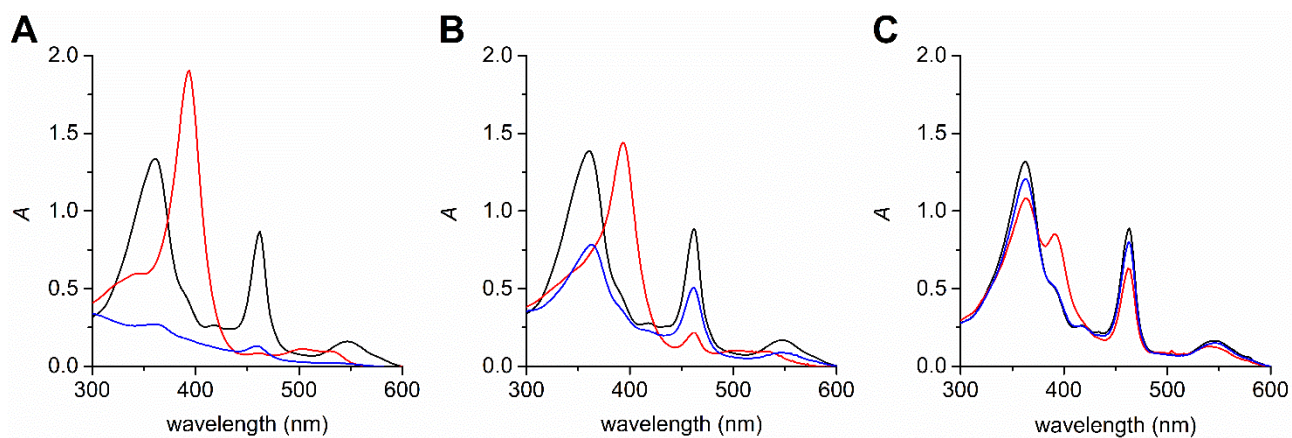

**Figure S4:** UV-Vis spectra of Mn-MC6\*a upon treatment with different amounts of H<sub>2</sub>O<sub>2</sub>: A) 100 eq.; B) 10 eq. and C) 1 eq. Spectra acquired prior to addition of peroxide are depicted as black lines. Red lines represent the maximal conversion of Mn<sup>III</sup>-MC6\*a into Compound I (observed at t = 5 s, 40 s and 90 s after the addition of peroxide for 100 eq., 10 eq. and 1 eq., respectively). Blue lines represent the spectra acquired after 20 minutes from the addition of peroxide (C = 20  $\mu$ M in 60 mM carbonate buffer containing 40% TFE (v/v), pH 10; T = 25  $^{\circ}$ C).

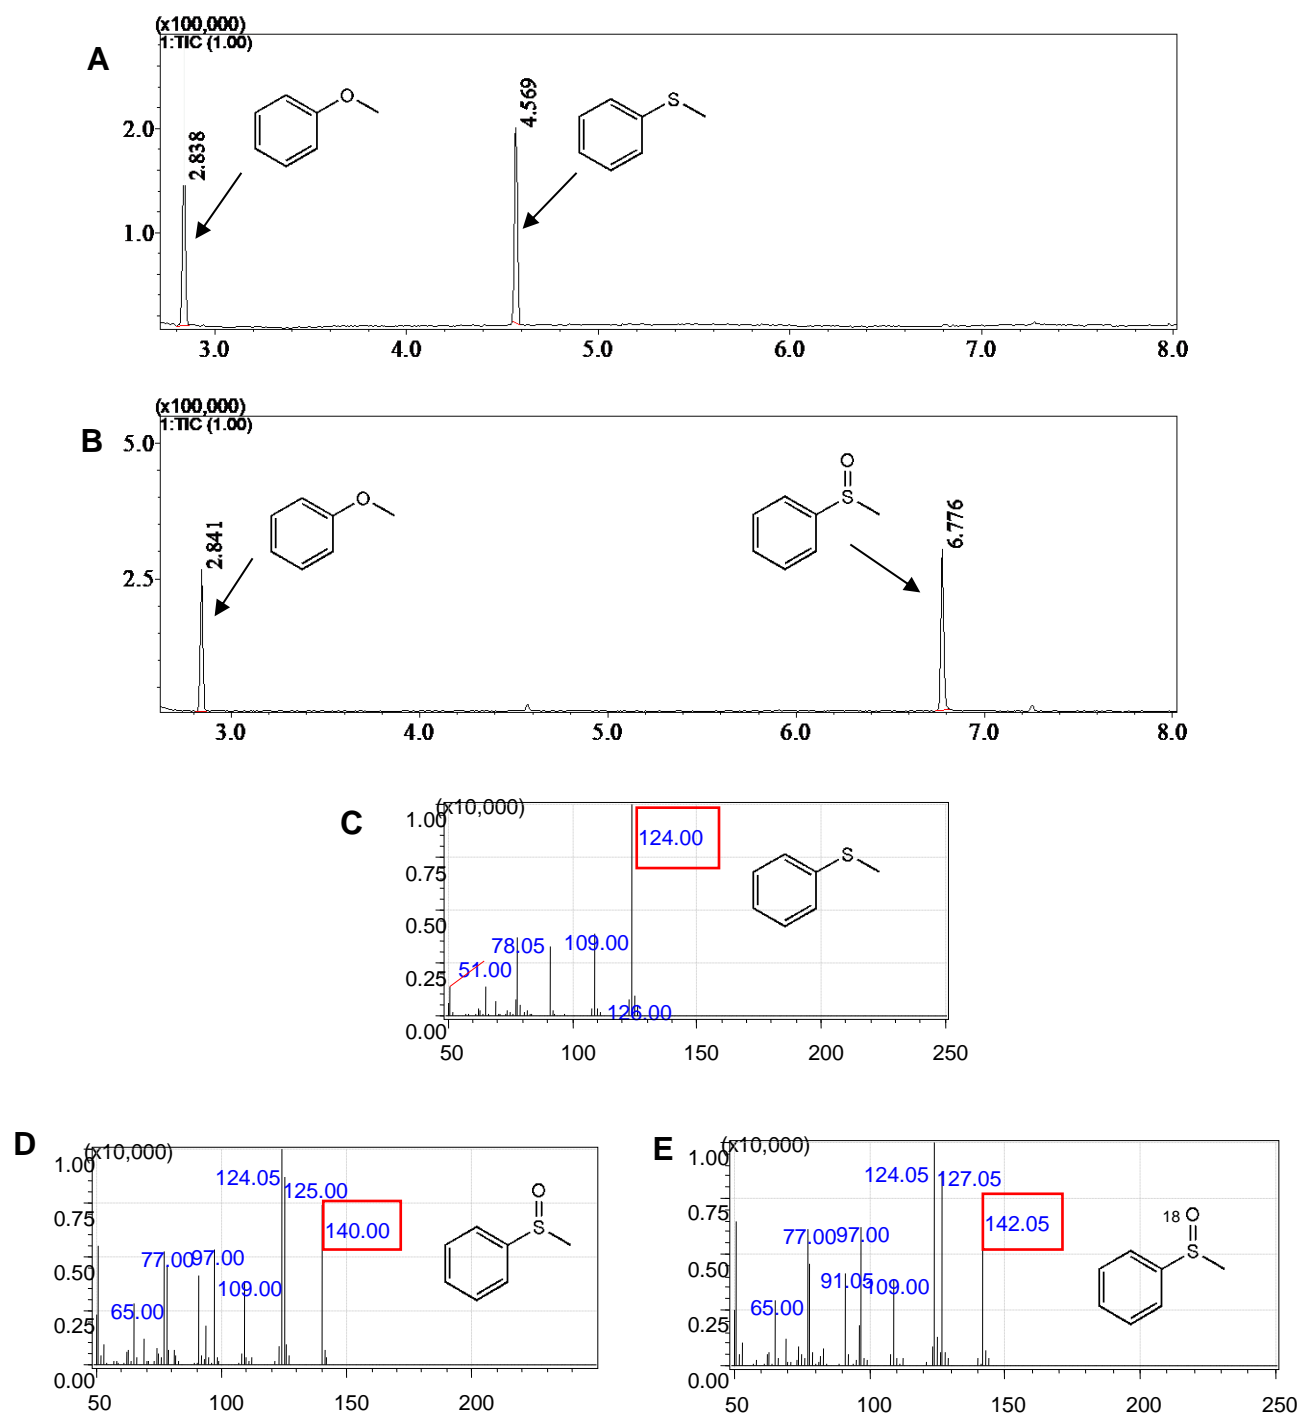

**Figure S5:** GC-MS TIC chromatogram of thioanisole sulfoxidation: A) before addition of peroxide and B) after reaction completion. Peak eluted at Rt= 2.84 min is relative to anisole (internal standard). C) and D) are the EI-MS spectra of products eluted at Rt = 4.57 min and 6.78 min, which were identified respectively as thioanisole and methyl-phenyl sulfoxide. E) is the EI-MS spectrum of  $^{18}\text{O}$  containing methyl-phenyl sulfoxide, obtained when reaction was carried out with  $\text{H}_2^{18}\text{O}_2$  as oxidant. Molecular ions are labeled in red.

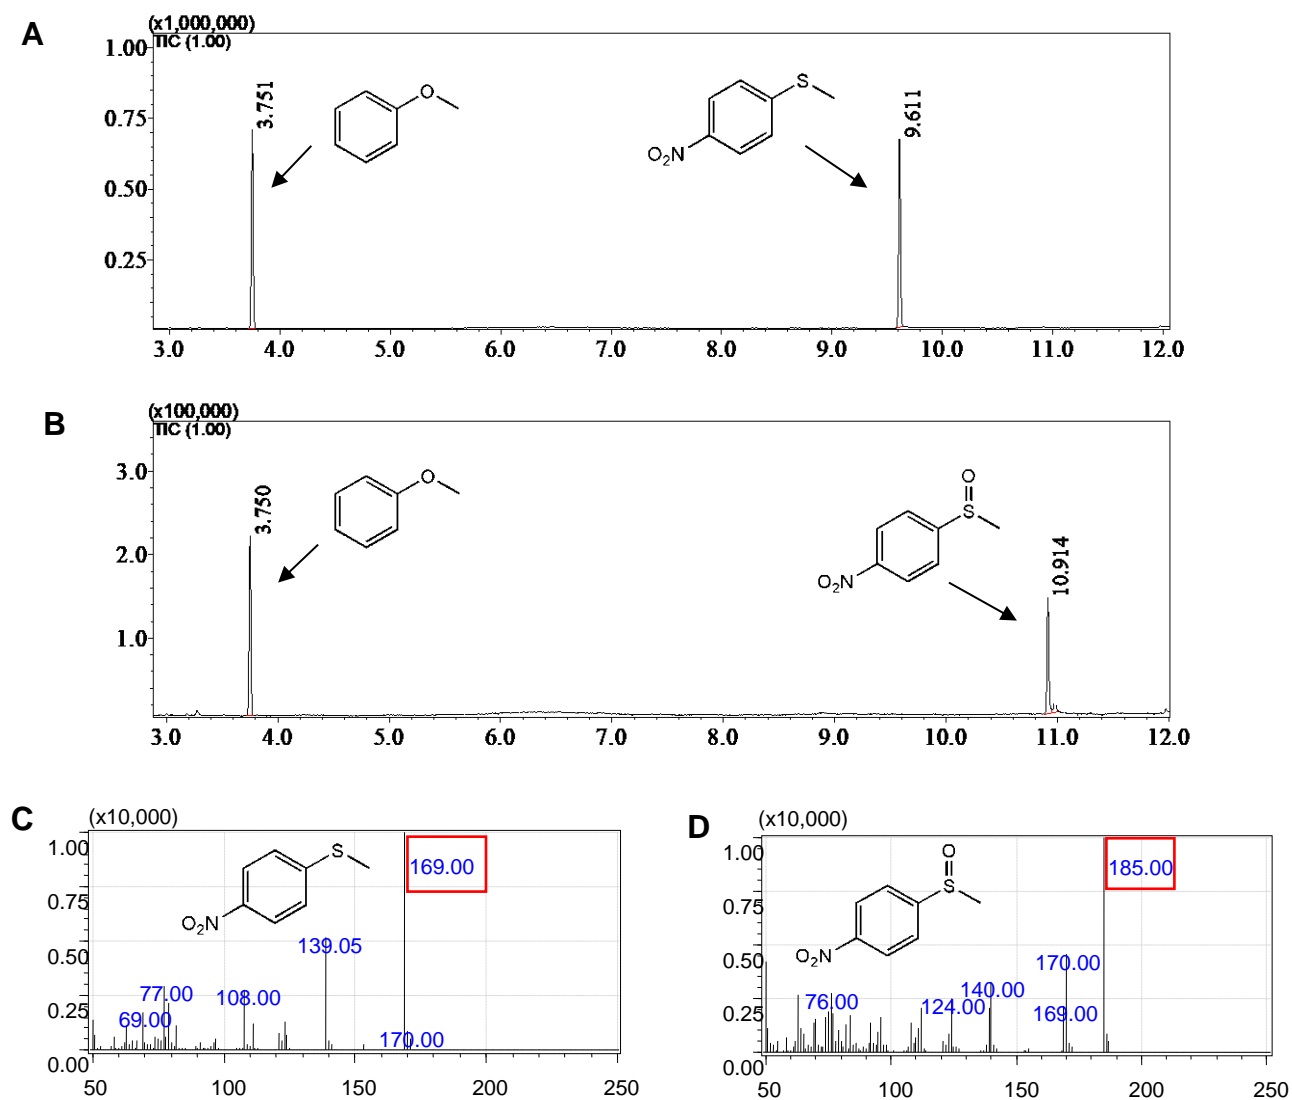

**Figure S6:** GC-MS TIC chromatogram of *p*NTA sulfoxidation: A) before addition of peroxide and B) after reaction completion. Peak eluted at  $R_t = 3.75$  min is relative to anisole (internal standard). C) and D) are the EI-MS spectra of peaks eluted at  $R_t = 9.61$  min and 10.91 min, which were identified respectively as *p*NTA and corresponding sulfoxide. Molecular ions are labeled in red.

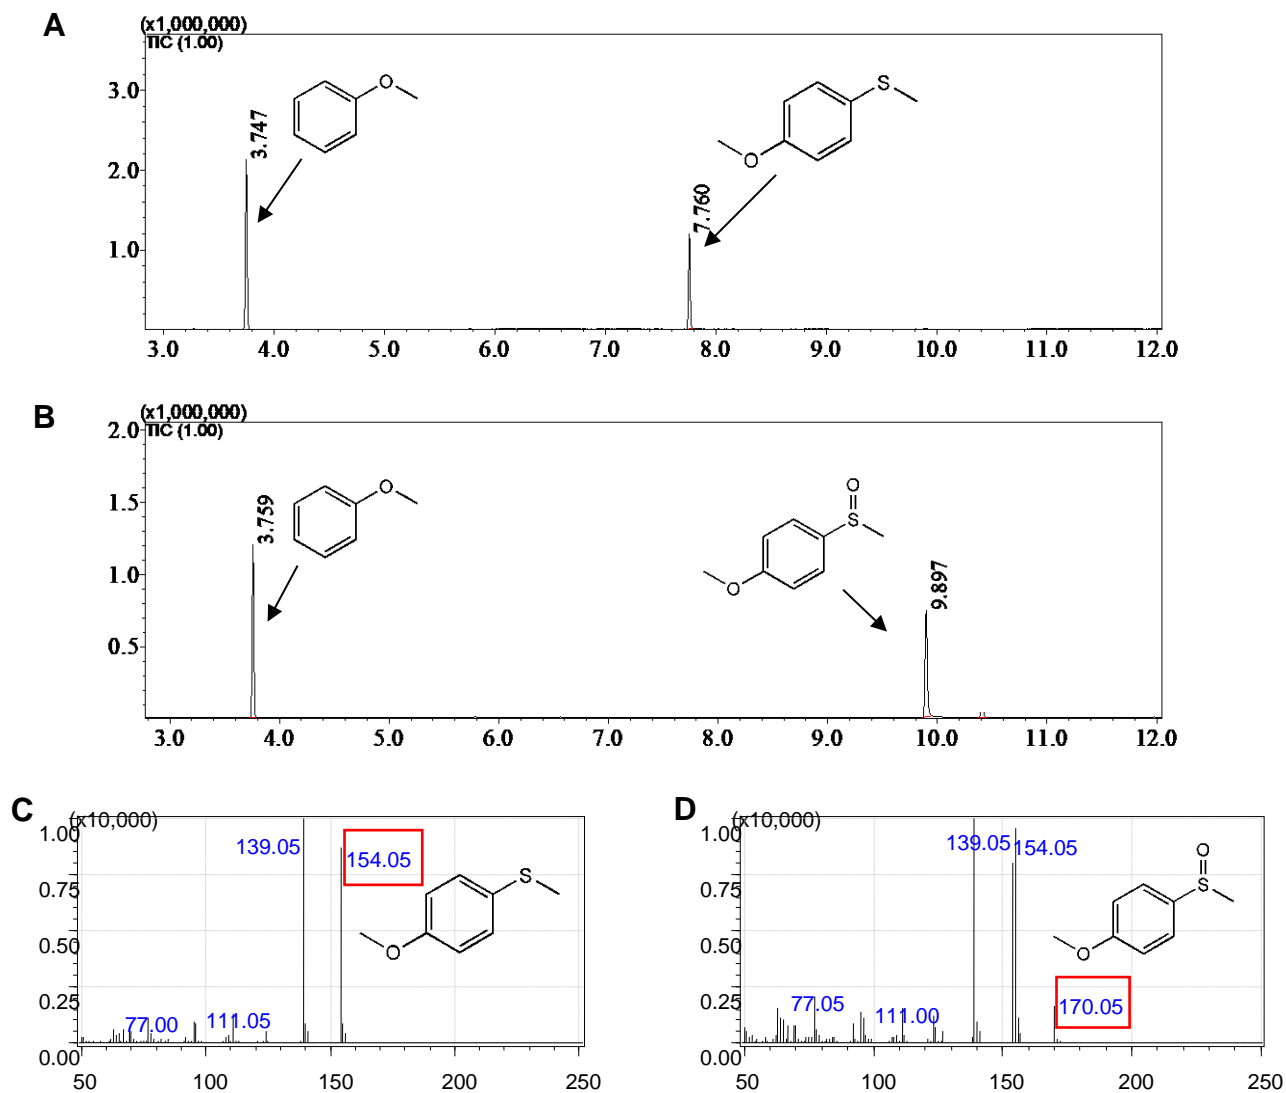

**Figure S7:** GC-MS TIC chromatogram of *p*MTA sulfoxidation: A) before addition of peroxide and B) after reaction completion. Peak eluted at Rt= 3.75 min is relative to anisole (internal standard). C) and D) are the EI-MS spectra of peaks eluted at Rt = 7.76 min and 9.90 min, which were identified respectively as *p*MTA and corresponding sulfoxide. Molecular ions are labeled in red.



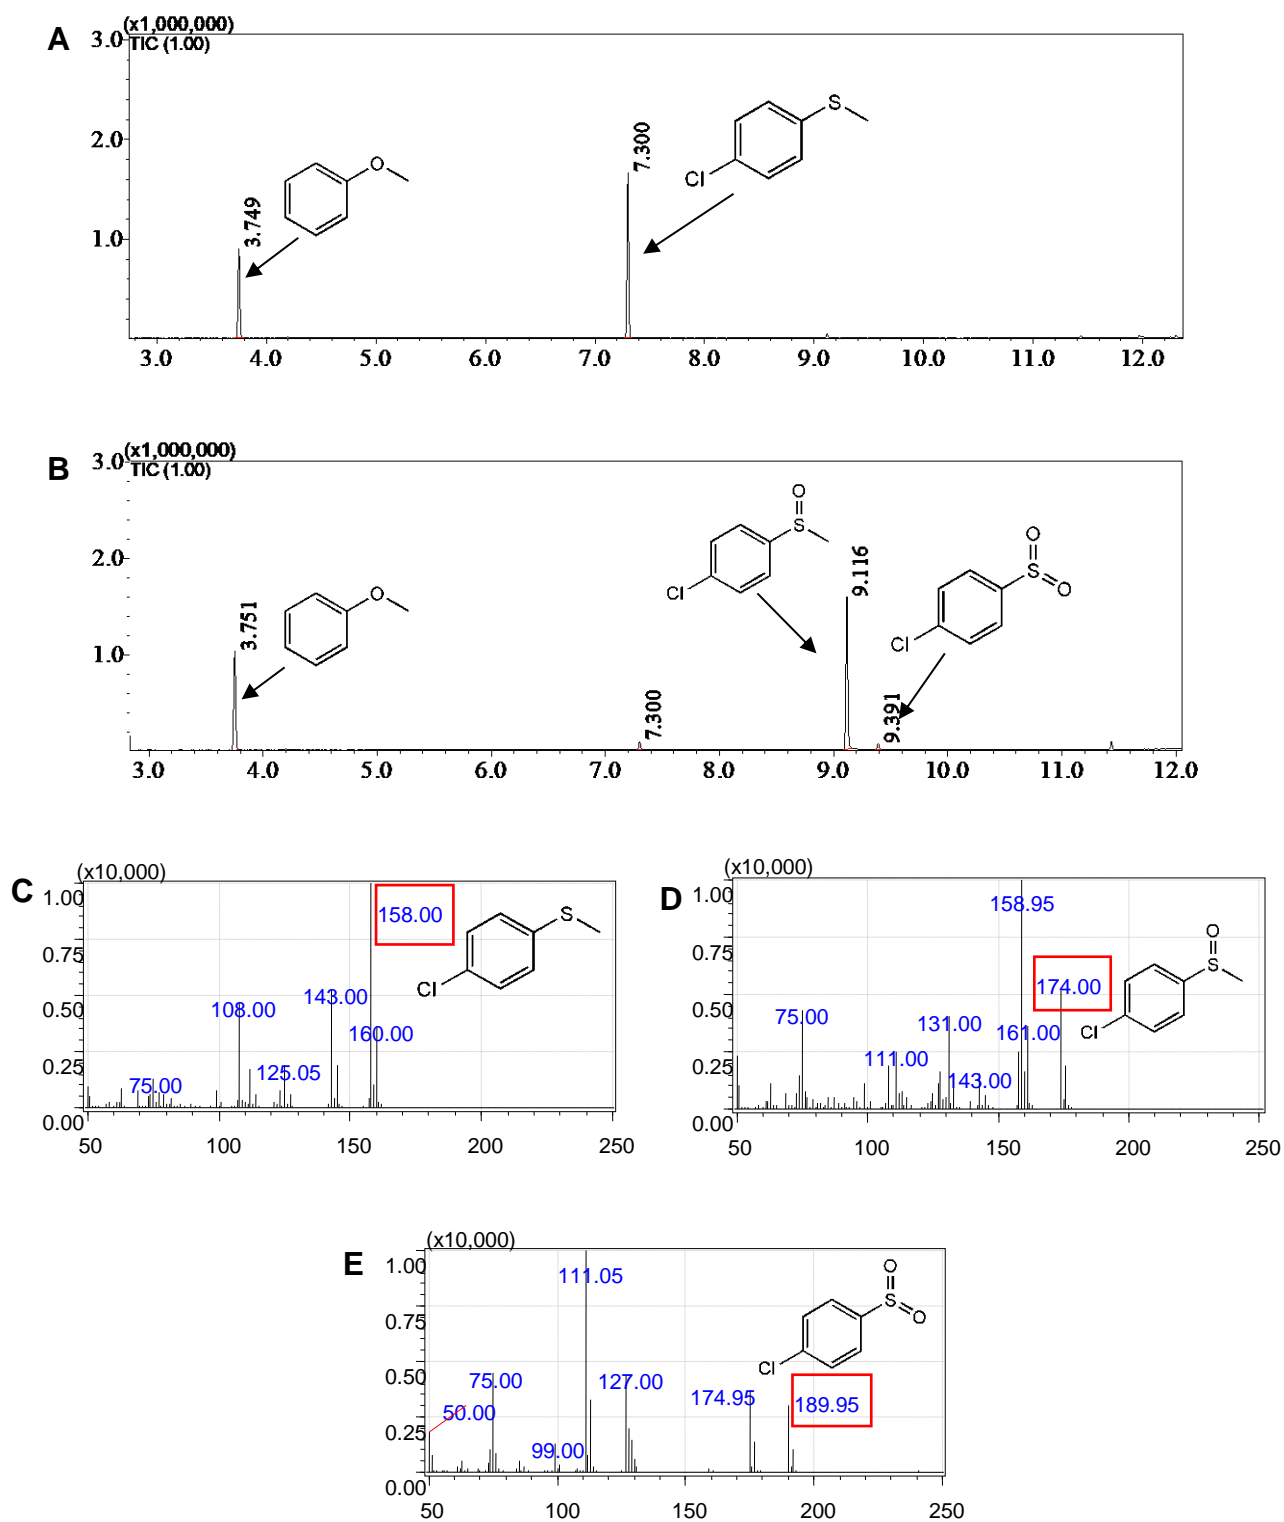

**Figure S8:** GC-MS TIC chromatogram of *p*CTA sulfoxidation: A) before addition of peroxide and B) after reaction completion. Peak eluted at  $R_t = 3.75$  min is relative to anisole (internal standard). C), D) and E) are the EI-MS spectra of peaks eluted at  $R_t = 7.30$  min, 9.12 min, and 9.39 min which were identified respectively as *p*CTA, corresponding sulfoxide and sulfone. Molecular ions are labeled in red.

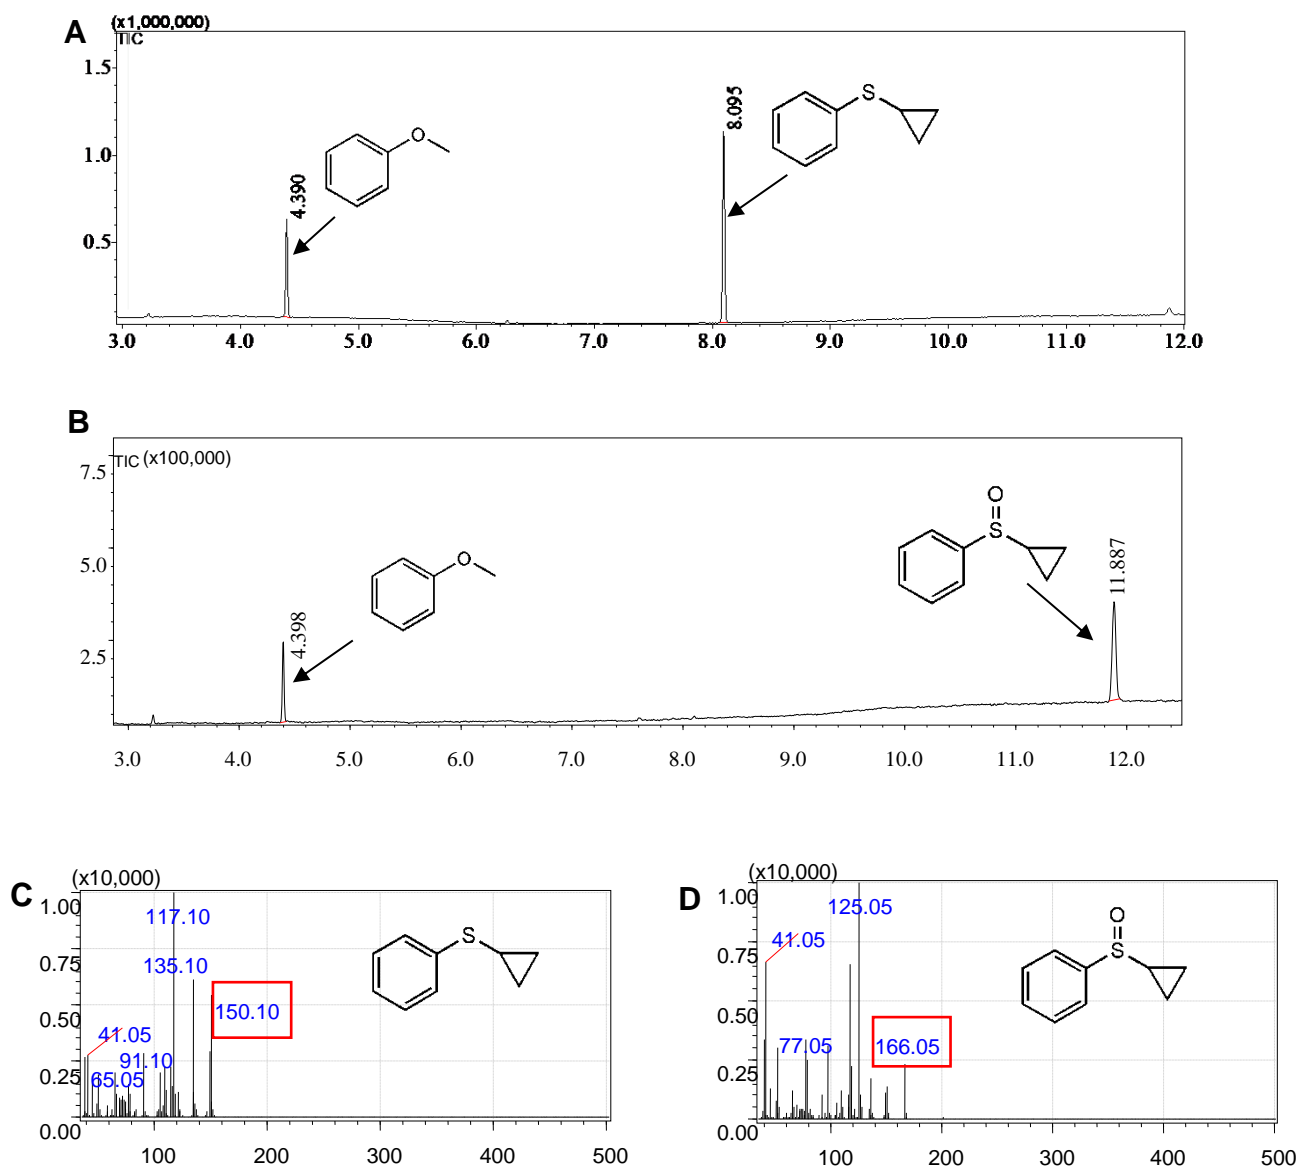

**Figure S9:** GC-MS TIC chromatogram of CPPS oxidation: A) before addition of peroxide and B) after reaction completion. Peak eluted at  $R_t = 4.40$  min is relative to anisole (internal standard). C) and D) are the EI-MS spectra of peaks eluted at  $R_t = 8.10$  min and 11.89 min which were identified respectively as CPPS and corresponding sulfoxide. Molecular ions are labeled in red.

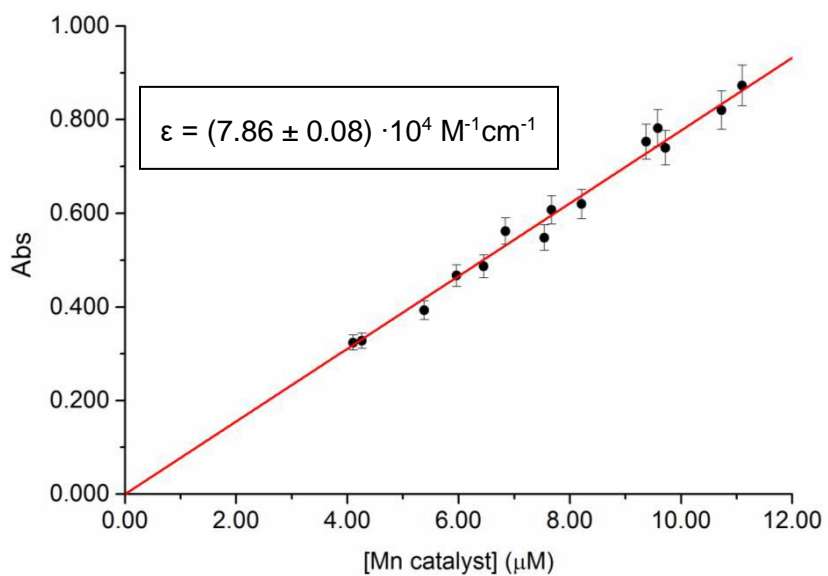

**Figure S10:** Plot of the absorbance at 365 nm as a function of  $\text{Mn}^{\text{III}}$ -MC6\*a concentration. Data were fitted to the Lambert-Beer's law.

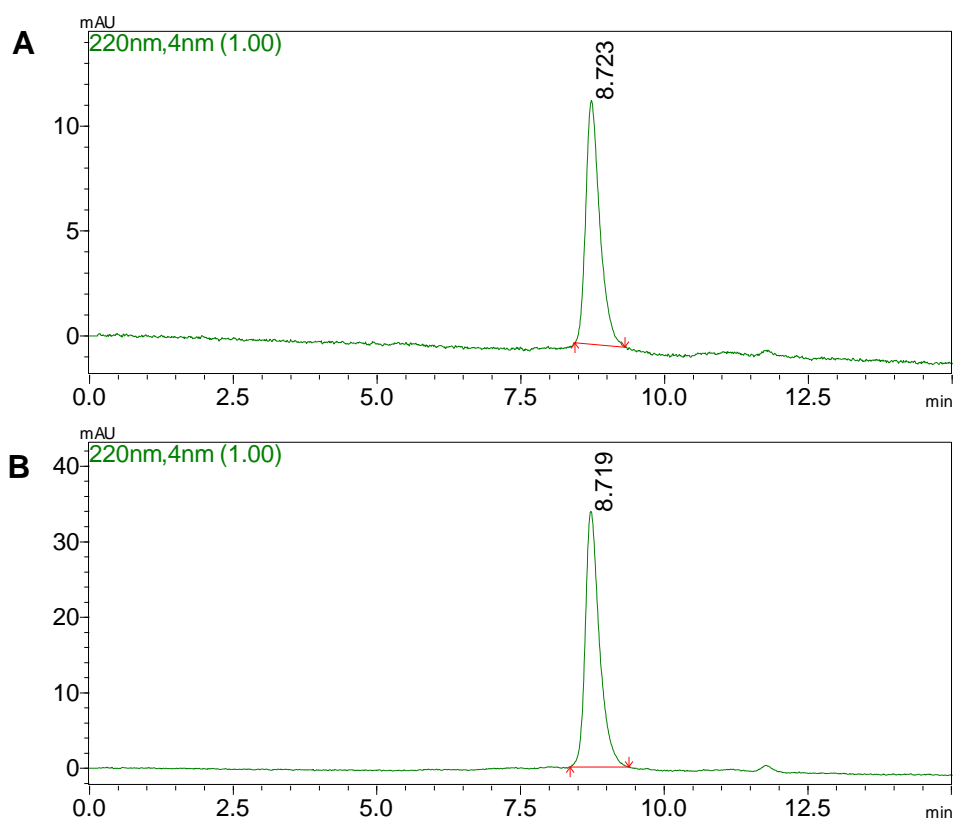

**Figure S11:** GFC chromatograms of: A)  $\text{Mn}^{\text{III}}$ -HRP; B)  $\text{Fe}^{\text{III}}$ -HRP (C = 0.1 mg/ml, 0.05 M sodium phosphate, 0.3 M NaCl, pH 6.8).

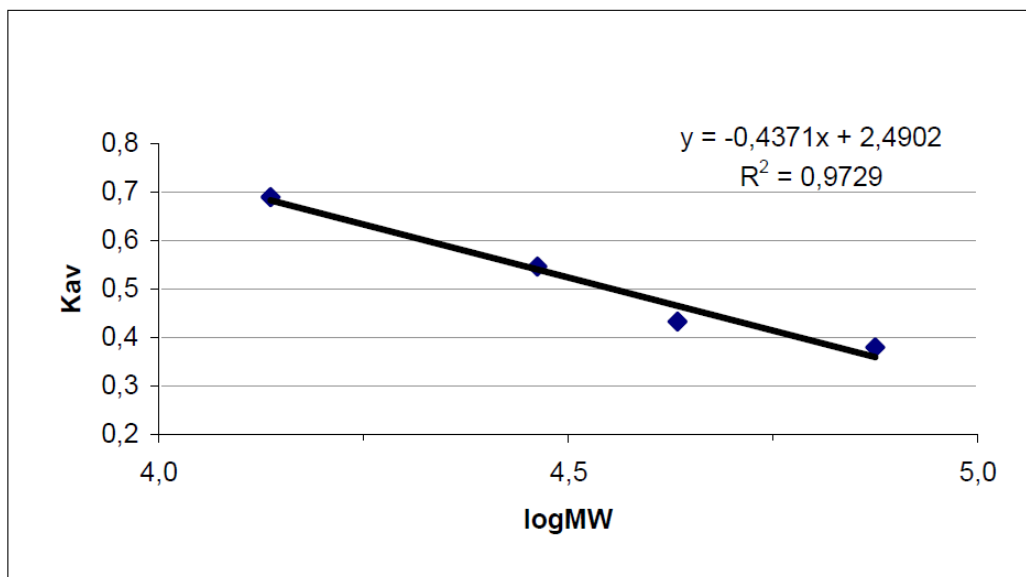

**Figure S12:** GFC calibration curve prepared used Conalbumin (MW: 75 kDa), Ovalbumin (MW: 43 kDa), Carbonic Anhydrase (MW: 29 kDa), Ribonuclease A (MW: 13.7 kDa).
